# Supplementary material
Source: PubMed Central journal article supplement (PMC7708293)

**Supplemental materials for:**

Ebell MH, Bentivegna M, Hulme C. Cancer-specific mortality, all-cause mortality, and overdiagnosis in lung cancer screening trials: a meta-analysis. *Ann Fam Med.* 2020;18(6):545-552.

**Supplemental Appendix. Search strategy used for the bridge search.**

("lung neoplasm"[tiab] OR "lung cancer"[tiab] OR "lung neoplasia"[tiab] OR "lung tumor"[tiab] OR "lung carcinoma" OR "lung adenocarcinoma") AND ("screen"[tiab] or "screening"[tiab]) AND ("randomized" OR "random" OR "clinical trial" OR "randomization" OR "randomize")

Limits: January 1, 2018 to March 1, 2020; has abstract; human

| <b>Supplemental Table 1. Mortality Data From Lung Cancer Screening Studies at Low Risk of Bias</b> |                       |              |                         |              |
|----------------------------------------------------------------------------------------------------|-----------------------|--------------|-------------------------|--------------|
|                                                                                                    | <b>Screened group</b> |              | <b>Comparison group</b> |              |
| <b>Study (year)</b>                                                                                | <b>Deaths</b>         | <b>Total</b> | <b>Deaths</b>           | <b>Total</b> |
| <b>Lung Cancer Mortality</b>                                                                       |                       |              |                         |              |
| NLST, 2011                                                                                         | 356                   | 26722        | 443                     | 26732        |
| MILD, 2019                                                                                         | 40                    | 2376         | 40                      | 1723         |
| DANTE, 2015                                                                                        | 59                    | 1264         | 55                      | 1186         |
| LSS, 2018                                                                                          | 32                    | 1660         | 26                      | 1658         |
| ITALUNG, 2017                                                                                      | 43                    | 1613         | 60                      | 1593         |
| NELSON, 2020                                                                                       | 186                   | 7900         | 248                     | 7892         |
| DLCST, 2015                                                                                        | 39                    | 2052         | 38                      | 2052         |
| LUSI, 2020                                                                                         | 29                    | 2029         | 40                      | 2023         |
| <b>All Cause Mortality</b>                                                                         |                       |              |                         |              |
| NLST, 2011                                                                                         | 1877                  | 26722        | 2000                    | 26732        |
| MILD, 2019                                                                                         | 137                   | 2376         | 106                     | 1723         |
| DANTE, 2015                                                                                        | 180                   | 1264         | 176                     | 1186         |
| LSS, 2018                                                                                          | 139                   | 1660         | 116                     | 1658         |
| ITALUNG, 2017                                                                                      | 111                   | 1613         | 121                     | 1593         |
| NELSON, 2020                                                                                       | 959                   | 7900         | 974                     | 7892         |
| DLCST, 2015                                                                                        | 165                   | 2052         | 163                     | 2052         |
| LUSI, 2020                                                                                         | 148                   | 2029         | 150                     | 2023         |

**Supplemental Table 2. Incidence Data From Lung Cancer Screening Studies at Low Risk of Bias**

| Study                | Long follow-up | Median follow-up (year) | Screened group |       | Comparison group |       |
|----------------------|----------------|-------------------------|----------------|-------|------------------|-------|
|                      |                |                         | Lung cancers   | Total | Lung cancers     | Total |
| <b>NLST, 2011</b>    | No             | 6.5                     | 1060           | 26722 | 941              | 26732 |
| <b>MILD, 2019</b>    | No             | 6.2                     | 98             | 2376  | 60               | 1723  |
| <b>DANTE, 2015</b>   | Yes            | 8.4                     | 104            | 1264  | 72               | 1186  |
| <b>ITALUNG, 2017</b> | Yes            | 9.3                     | 67             | 1613  | 71               | 1593  |
| <b>NELSON, 2020</b>  | Yes            | 10                      | 344            | 6583  | 304              | 6612  |
| <b>DLCST, 2015</b>   | Yes            | 9.8                     | 100            | 2052  | 53               | 2052  |
| <b>LUSI, 2020</b>    | Yes            | 8.8                     | 85             | 2029  | 67               | 2023  |

Supplemental Figure 1: PRISMA flow diagram of search

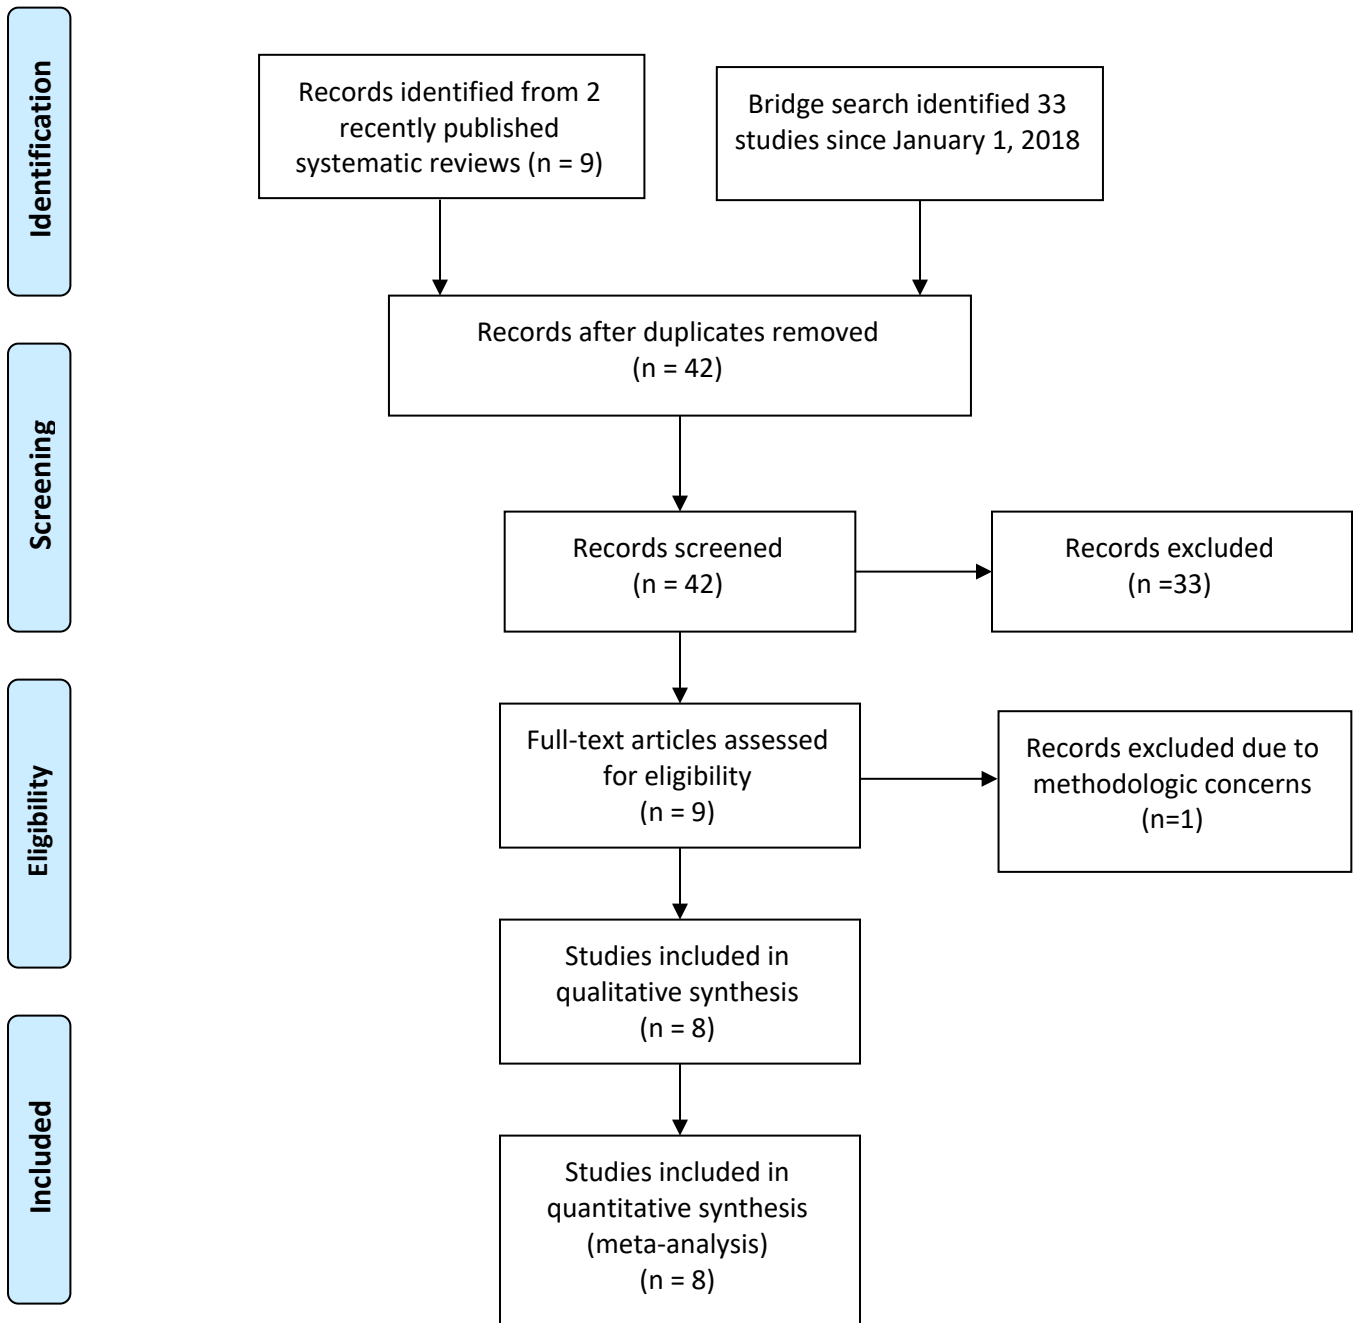

Supplemental Figure 2. Funnel plot showing no evidence of publication bias.

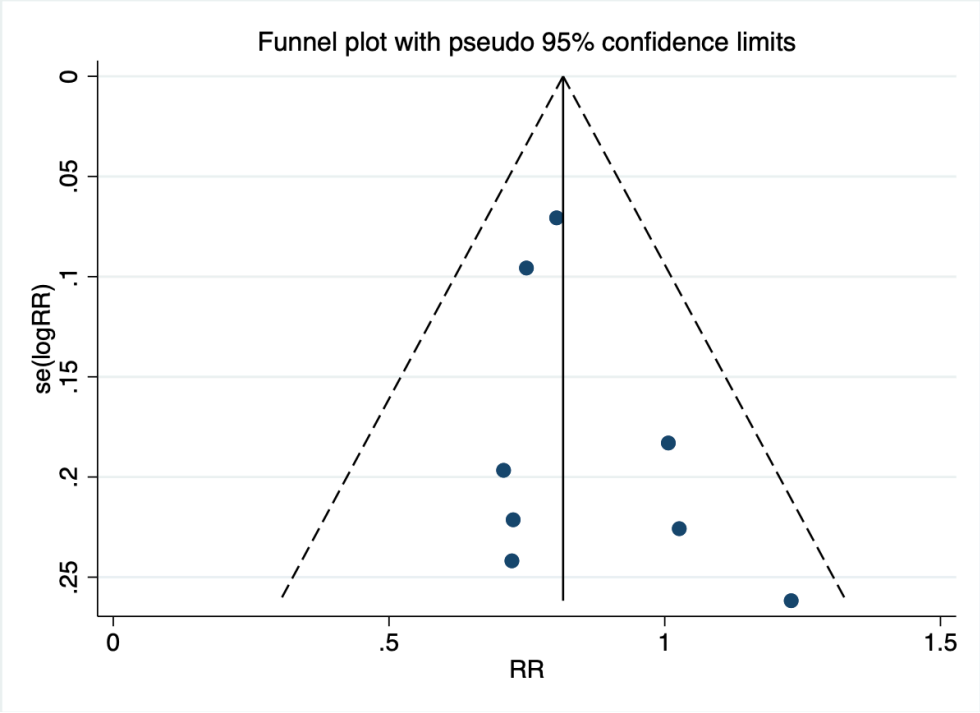

Supplement: Ebell_Supp_App-tables-figs.pdf [file Ebell_Supp_App-tables-figs.pdf]
